# Supplementary material for: Complementary Feeding Practices for South Asian Young Children Living in High-Income Countries: A Systematic Review
Source: MDPI journal article supplement (doi:10.3390/nu10111676), 2018-11-05
Supplement: s1 [file s1]

**Supplementary Table S1.** Timing of initiating complementary feeding (CF) according to ESPGHAN classifications [20].

| Infant Age                      | Study Proportions Within This Period [Reference]                  |
|---------------------------------|-------------------------------------------------------------------|
| Early (< 4 month/<17 weeks)     | 43% [29]                                                          |
|                                 | 17% (Indian), 12% (Pakistani), 14% (Bangladeshi) [32]             |
|                                 | 16% [34]                                                          |
|                                 | 20.6% (Pakistani), 12.1% (Other SA) [36]                          |
|                                 | 49% [37]                                                          |
|                                 | 70% (Indian), 73% (Pakistani), 72% (Bangladeshi) [39]             |
|                                 | Various discussion groups reported supplementing at 3 months [41] |
|                                 | Mean introduction of 2.3 months (juice), 3.1 months (cereal) [33] |
|                                 | 1.11% [38]                                                        |
|                                 | 4.3% ≤15 weeks, 34.1% 16-23 weeks [40]                            |
| Timely (17-26 weeks/4-6 months) | 57% [29]                                                          |
|                                 | 74% commenced <6 months (detail not provided) [30]                |
|                                 | Most mothers introduced solids in this period [32]                |
|                                 | 71% [34]                                                          |
|                                 | Mean of 20 (Pakistani), 22 weeks (Other SA) [36]                  |
|                                 | 36% [37]                                                          |
|                                 | 29% (Indian), 25% (Pakistani), 27% (Bangladeshi) [39]             |
|                                 | 88.33% [38]                                                       |
| Delayed (7+ months/27+ weeks)   | 34.1% 16-23 weeks, 58.7% 24-31 weeks [40]                         |
|                                 | 13% [34]                                                          |
|                                 | 15% [37]                                                          |
|                                 | 1% (Indian), 2% (Pakistani), 1% (Bangladeshi) [39]                |
|                                 | 10.55% [38]                                                       |
|                                 | 58.7% 24-31 weeks, 2.9% ≥32 weeks [40]                            |
